# Supplementary material for: Direct patterning of organic conductors on knitted textiles for long-term electrocardiography
Source: PubMed Central journal article supplement (PMC4597223; doi:10.1038/srep15003), 2015-10-08
Supplement: srep15003-s1.pdf [file srep15003-s1.pdf]

# Supplementary Information

## Direct patterning of organic conductors on knitted textiles for long-term electrocardiography

Seiichi Takamatsu†, Thomas Lonjaret†, Dakota Crisp, Jean-Michel Badier, George G. Malliaras, and Esma Ismailova\*

**Supplementary Fig. S1. Evaluation of the patterning resolution on two different type of textiles.** (a) Conventional lines-and-spaces patterns ranging from 1 mm to 6 mm and stripes of different widths on a Nylon woven ribbon; (b) Patterning of stripes of different widths on a knitted polyester fabric. The inset shows the width of a stripe being slightly larger than a single loop of the knitted fabric, which is around 500 $\mu$ m.

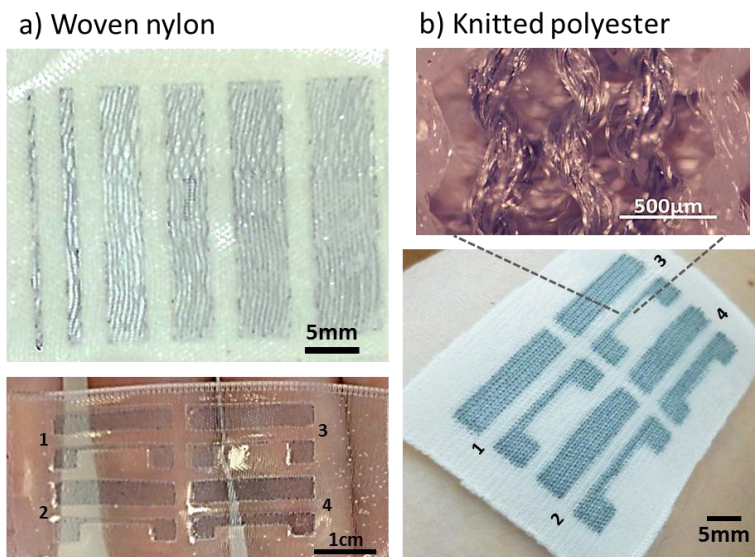

**Supplementary Table S1. Long-term evaluation of ECG signals obtained from textile electrodes.** R-Peak amplitude and Signal-to-Noise Ratio (SNR) were calculated from 30s epoch of ECG signal regularly collected during 3 days (mean ( $\pm$ standard deviation)). The last ECG signal was obtained from a re-used textile electrode stored on open-air for one month.

| ECG SIGNAL EVOLUTION  | Continuously in contact with the skin |                    |                    |                    |                    |                    | Re-used            |
|-----------------------|---------------------------------------|--------------------|--------------------|--------------------|--------------------|--------------------|--------------------|
|                       | 0h                                    | 1h                 | 12h                | 24h                | 48h                | 72h                | 1 month            |
| R-Peak Amplitude (mV) | 1.27 ( $\pm$ 0.09)                    | 1.13 ( $\pm$ 0.05) | 1.45 ( $\pm$ 0.04) | 1.45 ( $\pm$ 0.03) | 0.76 ( $\pm$ 5)    | 1.23 ( $\pm$ 0.08) | 0.67 ( $\pm$ 0.03) |
| SNR (dB)              | 4.64 ( $\pm$ 0.53)                    | 4.53 ( $\pm$ 0.38) | 6.45 ( $\pm$ 0.12) | 6.07 ( $\pm$ 0.07) | 4.01 ( $\pm$ 0.16) | 4.88 ( $\pm$ 0.5)  | 4.33 ( $\pm$ 0.33) |
